# Supplementary material for: Application of Ultrafiltration to Produce Sheep’s and Goat’s Whey-Based Synbiotic Kefir Products
Source: MDPI journal article supplement (doi:10.3390/membranes13050473), 2023-04-28
Supplement: s1 [file s1]

**Table S1.**-Color difference values ( $\Delta E_{ab}^*$ ) between different sheep's kefir products, and for the same product over storage.

|                   | EK 1d | EKABT5 1d | TK 1d | TKABT5 1d | EK 10d | EKABT5 10d | TK 10d | TKABT5 10d | EK 20d | EKABT5 20d | TK 20d | TKABT5 20d | EK 30d | EKABT5 30d | TK 30d |
|-------------------|-------|-----------|-------|-----------|--------|------------|--------|------------|--------|------------|--------|------------|--------|------------|--------|
| <b>EKABT5 1d</b>  | 40.4  |           |       |           |        |            |        |            |        |            |        |            |        |            |        |
| <b>TK 1d</b>      | 18.3  | 4.6       |       |           |        |            |        |            |        |            |        |            |        |            |        |
| <b>TKABT5 1d</b>  | 0.8   | 31.3      | 12.7  |           |        |            |        |            |        |            |        |            |        |            |        |
| <b>EK 10d</b>     | 12.9  | 91.0      | 58.1  | 17.2      |        |            |        |            |        |            |        |            |        |            |        |
| <b>EKABT5 10d</b> | 2.3   | 33.7      | 15.6  | 1.3       | 14.0   |            |        |            |        |            |        |            |        |            |        |
| <b>TK 10d</b>     | 6.5   | 43.8      | 24.7  | 5.4       | 10.5   | 1.7        |        |            |        |            |        |            |        |            |        |
| <b>TKABT5 10d</b> | 8.2   | 74.0      | 45.1  | 10.9      | 1.0    | 7.9        | 5.2    |            |        |            |        |            |        |            |        |
| <b>EK 20d</b>     | 25.0  | 2.2       | 1.2   | 17.6      | 66.9   | 20.0       | 28.3   | 52.4       |        |            |        |            |        |            |        |
| <b>EKABT5 20d</b> | 5.3   | 33.2      | 16.8  | 2.9       | 16.5   | 1.4        | 1.6    | 9.6        | 19.1   |            |        |            |        |            |        |
| <b>TK 20d</b>     | 24.9  | 13.5      | 10.8  | 17.1      | 50.9   | 14.3       | 15.4   | 37.9       | 7.7    | 10.2       |        |            |        |            |        |
| <b>TKABT5 20d</b> | 12.5  | 15.7      | 7.5   | 7.4       | 34.8   | 5.5        | 7.6    | 24.3       | 7.6    | 4.1        | 2.2    |            |        |            |        |
| <b>EK 30d</b>     | 51.4  | 0.8       | 8.9   | 40.8      | 105.6  | 42.8       | 52.9   | 86.9       | 5.0    | 41.2       | 16.1   | 20.8       |        |            |        |
| <b>EKABT5 30d</b> | 50.3  | 0.9       | 8.9   | 39.7      | 102.6  | 41.0       | 50.3   | 84.2       | 4.8    | 39.2       | 14.1   | 19.0       | 0.1    |            |        |
| <b>TK 30d</b>     | 59.1  | 2.3       | 12.9  | 47.4      | 114.2  | 48.5       | 57.9   | 94.6       | 7.8    | 46.2       | 17.3   | 23.7       | 0.5    | 0.4        |        |
| <b>TKABT5 30d</b> | 60.2  | 2.2       | 12.9  | 48.5      | 117.2  | 50.4       | 60.6   | 97.4       | 7.9    | 48.1       | 19.2   | 25.5       | 0.4    | 0.5        | 0.1    |

**Table S2.**-Color difference values ( $\Delta E_{ab}^*$ ) between different goat's kefir products, and for the same product over storage.

|            | EK 1d | EKABT5 1d | TK 1d | TKABT5 1d | EK 10d | EKABT5 10d | TK 10d | TKABT5 10d | EK 20d | EKABT5 20d | TK 20d | TKABT5 20d | EK 30d | EKABT5 30d | TK 30d |
|------------|-------|-----------|-------|-----------|--------|------------|--------|------------|--------|------------|--------|------------|--------|------------|--------|
| EKABT5 1d  | 2.6   |           |       |           |        |            |        |            |        |            |        |            |        |            |        |
| TK 1d      | 1.7   | 1.8       |       |           |        |            |        |            |        |            |        |            |        |            |        |
| TKABT5 1d  | 0.2   | 4.0       | 2.3   |           |        |            |        |            |        |            |        |            |        |            |        |
| EK 10d     | 2.3   | 8.8       | 4.2   | 1.5       |        |            |        |            |        |            |        |            |        |            |        |
| EKABT5 10d | 2.5   | 9.2       | 5.0   | 1.7       | 0.1    |            |        |            |        |            |        |            |        |            |        |
| TK 10d     | 2.4   | 8.6       | 3.9   | 1.6       | 0.0    | 0.2        |        |            |        |            |        |            |        |            |        |
| TKABT5 10d | 2.3   | 8.5       | 3.8   | 1.5       | 0.0    | 0.2        | 0.0    |            |        |            |        |            |        |            |        |
| EK 20d     | 3.7   | 11.4      | 6.0   | 2.5       | 0.2    | 0.2        | 0.2    | 0.2        |        |            |        |            |        |            |        |
| EKABT5 20d | 2.2   | 8.5       | 4.2   | 1.4       | 0.0    | 0.1        | 0.0    | 0.0        | 0.2    |            |        |            |        |            |        |
| TK2 0d     | 3.4   | 11.1      | 6.0   | 2.4       | 0.2    | 0.1        | 0.3    | 0.3        | 0.0    | 0.2        |        |            |        |            |        |
| TKABT5 20d | 3.7   | 11.6      | 6.4   | 2.6       | 0.2    | 0.2        | 0.3    | 0.3        | 0.0    | 0.2        | 0.0    |            |        |            |        |
| EK 30d     | 49.2  | 66.4      | 47.0  | 45.2      | 30.8   | 31.9       | 30.3   | 30.6       | 27.6   | 31.8       | 29.0   | 28.2       |        |            |        |
| EKABT5 30d | 60.3  | 78.6      | 57.1  | 55.9      | 39.9   | 41.3       | 39.3   | 39.6       | 36.3   | 41.0       | 37.9   | 37.0       | 0.6    |            |        |
| TK 30d     | 59.9  | 78.9      | 57.5  | 55.3      | 39.3   | 40.6       | 38.8   | 39.1       | 35.6   | 40.4       | 37.1   | 36.2       | 0.6    | 0.1        |        |
| TKABT5 30d | 57.6  | 76.3      | 55.4  | 53.1      | 37.4   | 38.7       | 36.9   | 37.3       | 33.8   | 38.5       | 35.4   | 34.4       | 0.4    | 0.2        | 0.0    |
